# Supplementary material for: Detecting the occurrence of preferential flow in soils with stable water isotopes
Source: Copernicus journal article supplement (doi:10.5194/hess-30-485-2026), 2026-01-30
Supplement: Supplementary file [file hess-30-485-2026-supplement-title-page.pdf › hess-30-485-2026-supplement-title-page.pdf]

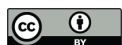

*Supplement of*

## **Detecting the occurrence of preferential flow in soils with stable water isotopes**

**Jonas Pyschik and Markus Weiler**

*Correspondence to:* Jonas Pyschik ([science@jonas-pyschik.com](mailto:science@jonas-pyschik.com))

- [hess-30-485-2026-supplement-title-page.pdf](#)
- [PF\\_SWIS\\_analysis.R](#)

The copyright of individual parts of the supplement might differ from the article licence.
